# Supplementary material for: Enhanced thermal energy harvesting performance of a cobalt redox couple in ionic liquid–solvent mixtures
Source: Royal Society of Chemistry journal article supplement (doi:10.1039/c5cp04305k), 2015-09-08
Supplement: c5cp04305k1.pdf [file c5cp04305k1.pdf]

## Supporting Information

### Enhanced thermal energy harvesting performance of a cobalt redox couple in ionic liquid-solvent mixtures

Manoj Lazar, Danah Al-Masri, Douglas R. MacFarlane and Jennifer M. Pringle\*

**Table S1.** TEC performance of the 0.1 M cobalt redox couple in different electrolytes with different cold electrode temperatures, and  $T_{\text{hot}}=130$  °C.

| Electrolyte                                    | $P_{\text{max}}$<br>(mW.m <sup>-2</sup> ) |                           |                           |
|------------------------------------------------|-------------------------------------------|---------------------------|---------------------------|
|                                                | $T_{\text{cold}} = 60$ °C                 | $T_{\text{cold}} = 70$ °C | $T_{\text{cold}} = 90$ °C |
| Neat [C <sub>2</sub> mim][B(CN) <sub>4</sub> ] | 221                                       | 178                       | 90                        |
| IL:MPN (3:1)                                   | 409                                       | 294                       | 134                       |
| IL:MPN (1:1)                                   | 612                                       | 432                       | 197                       |
| MPN:IL (3:1)                                   | 784                                       | 483                       | 216                       |
| Neat MPN                                       | 452                                       | 292                       | 105                       |

**Table S2.** The solution resistance ( $R_{\text{sol}}$ ) and charge transfer resistance ( $R_{\text{CT}}$ ) at all volume ratios of the MPN-[C<sub>2</sub>mim][B(CN)<sub>4</sub>] and DMSO-[C<sub>2</sub>mim][eFAP] system, containing 0.1M [Co<sup>II/III</sup>(bpy)<sub>3</sub>](NTf<sub>2</sub>)<sub>2/3</sub>, determined by EIS at 95 °C.

| Electrolyte                                    | $R_{\text{sol}}$ (Ω) | $R_{\text{CT}}$ (Ω) |
|------------------------------------------------|----------------------|---------------------|
| Neat [C <sub>2</sub> mim][B(CN) <sub>4</sub> ] | 37                   | 26                  |
| IL:MPN (3:1)                                   | 30                   | 15                  |
| IL:MPN (1:1)                                   | 29                   | 7                   |
| IL:MPN (1:3)                                   | 36                   | 17                  |
| Neat MPN                                       | 88                   | 6                   |
| Neat [C <sub>2</sub> mim][eFAP]                | 87                   | 98                  |
| IL:DMSO (3:1)                                  | 60                   | 20                  |
| IL:DMSO (1:1)                                  | 51                   | 10                  |
| IL:DMSO (1:3)                                  | 52                   | 8                   |
| Neat DMSO                                      | 104                  | 4                   |

**Table S3.** Diffusion coefficients of the  $\text{Co}^{\text{II/III}}(\text{bpy})_3(\text{NTf}_2)_{2/3}$  redox couple in all electrolyte systems.

| Electrolyte                                          | Diffusion coefficient<br>( $\text{m}^2 \text{s}^{-1}$ )<br>$\text{Co}^{\text{II}}(\text{bpy})_3$ | Diffusion coefficient<br>( $\text{m}^2 \text{s}^{-1}$ )<br>$\text{Co}^{\text{III}}(\text{bpy})_3$ |
|------------------------------------------------------|--------------------------------------------------------------------------------------------------|---------------------------------------------------------------------------------------------------|
| Neat $[\text{C}_2\text{mim}][\text{B}(\text{CN})_4]$ | 1.5E-09                                                                                          | 1.1E-09                                                                                           |
| IL:MPN (3:1)                                         | 1.2E-09                                                                                          | 9.6E-10                                                                                           |
| IL:MPN (1:1)                                         | 7.6E-10                                                                                          | 7.4E-10                                                                                           |
| IL:MPN (1:3)                                         | 4.9E-10                                                                                          | 5.2E-10                                                                                           |
| Neat MPN                                             | 2.4E-10                                                                                          | 3.2E-10                                                                                           |
| Neat $[\text{C}_2\text{mim}][\text{eFAP}]$           | 1.0E-10                                                                                          | 5.6E-10                                                                                           |
| IL:DMSO (3:1)                                        | 2.2E-10                                                                                          | 4.6E-10                                                                                           |
| IL:DMSO (1:1)                                        | 4.7E-10                                                                                          | 3.9E-10                                                                                           |
| IL:DMSO (1:3)                                        | 6.2E-10                                                                                          | 2.0E-10                                                                                           |
| Neat MPN                                             | 9.1E-10                                                                                          | 6.7E-11                                                                                           |
| 0.2 M TBABF <sub>4</sub> in MPN                      | 1.5E-09                                                                                          | 1.5E-09                                                                                           |
| 0.4 M TBABF <sub>4</sub> in MPN                      | 1.3E-09                                                                                          | 8.8E-10                                                                                           |
| 0.5 M TBAPF <sub>6</sub> in MPN                      | 8.9E-10                                                                                          | 8.3E-10                                                                                           |
| 1.1 M TBAPF <sub>6</sub> in MPN                      | 6.2E-10                                                                                          | 6.7E-10                                                                                           |

**Table S4.** TEC performance at various cobalt redox couple concentrations in 3:1 MPN:  $[\text{C}_2\text{mim}][\text{B}(\text{CN})_4]$ ;  $T_{\text{hot}}=130\text{ }^\circ\text{C}$ .

| Redox couple<br>concentration / M | $P_{\text{max}}$<br>( $\text{mW}/\text{m}^2$ ) |                                              |                                              |
|-----------------------------------|------------------------------------------------|----------------------------------------------|----------------------------------------------|
|                                   | $T_{\text{cold}} = 60\text{ }^\circ\text{C}$   | $T_{\text{cold}} = 70\text{ }^\circ\text{C}$ | $T_{\text{cold}} = 90\text{ }^\circ\text{C}$ |
| 0.025                             | 519                                            | 269                                          | 112                                          |
| 0.050                             | 586                                            | 368                                          | 170                                          |
| 0.075                             | 697                                            | 448                                          | 191                                          |
| 0.1                               | 780                                            | 483                                          | 216                                          |
| 0.125                             | 613                                            | 420                                          | 162                                          |
| 0.2                               | 497                                            | 303                                          | 127                                          |
| 0.3                               | 505                                            | 289                                          | 133                                          |
| 0.4                               | 471                                            | 253                                          | 120                                          |

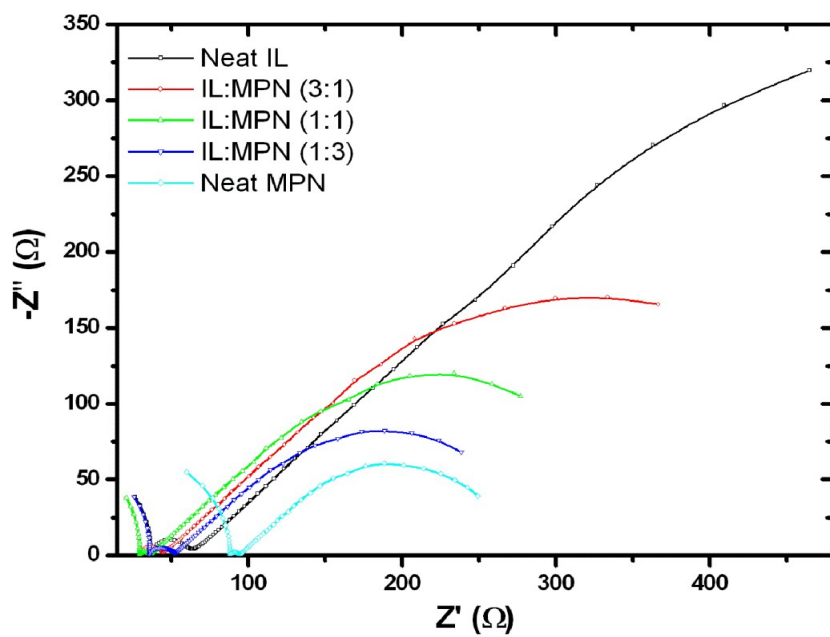

**Fig. S1** Nyquist plot of 0.1M  $[\text{Co}^{\text{II/III}}(\text{bpy})_3](\text{NTf}_2)_{2/3}$  in neat IL, neat MPN and in their different volume mixtures (at 95 °C).
